# Supplementary material
Source: Springer Nature journal article supplement (https://www.springermedizin.de/resource/supplementary/13014_2010_368_MOESM3_ESM.pdf/9633632)

A

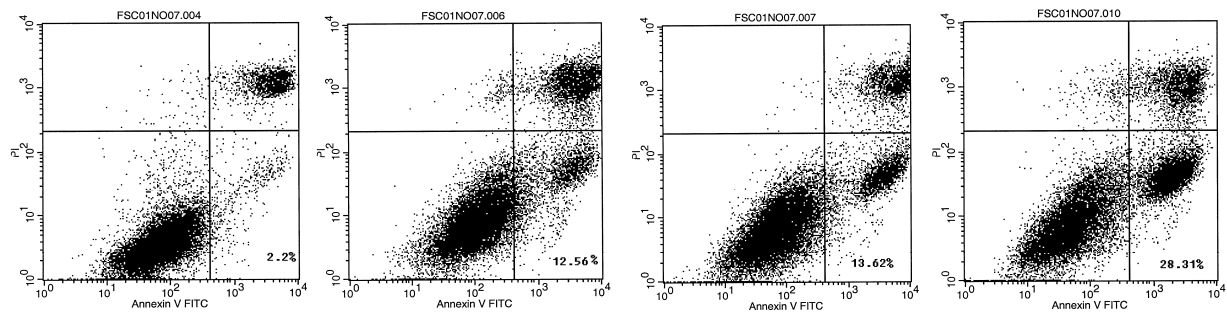

Control

IR

Perifosine

Combined

B

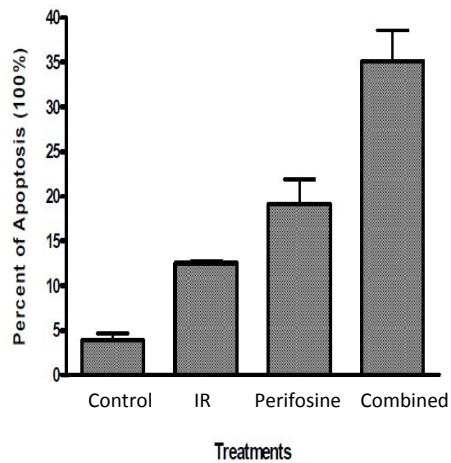

C

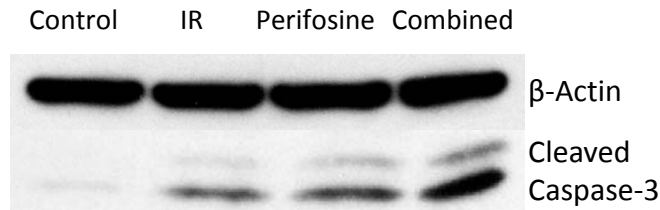

Supplement: MOESM3 [file 9633632]
